# Supplementary material
Source: publisher figshare collection journal article supplement (https://acs.figshare.com/ndownloader/files/4609786)

# Bioactive Asteric Acid Derivatives from the Antarctic Ascomycete Fungus *Geomyces* sp.

Yan Li,<sup>†,‡</sup> Bingda Sun,<sup>†</sup> Shuchun Liu,<sup>†</sup> Lihua Jiang,<sup>†</sup> Xingzhong Liu,<sup>†</sup> Hua Zhang,<sup>§</sup> and  
Yongsheng Che<sup>\*,†</sup>

*Key Laboratory of Systematic Mycology and Lichenology, Institute of Microbiology,  
Chinese Academy of Sciences, Beijing 100080, People's Republic of China, and  
Graduate School of Chinese Academy of Sciences, Beijing 100039, People's Republic of  
China, and New Drug Research and Development Center, North China Pharmaceutical  
Group Corporation, Shijiazhuang 050015, People's Republic of China*

| Contents                                                                                                       | Page |
|----------------------------------------------------------------------------------------------------------------|------|
| 1) <b>Figure S1.</b> <sup>1</sup> H NMR spectrum of ethyl asterrate ( <b>3</b> ; 500 MHz, CDCl <sub>3</sub> )  | 3    |
| 2) <b>Figure S2.</b> <sup>13</sup> C NMR spectrum of ethyl asterrate ( <b>3</b> ; 100 MHz, CDCl <sub>3</sub> ) | 4    |
| 3) <b>Figure S3.</b> <sup>1</sup> H NMR spectrum of butyl asterrate ( <b>4</b> ; 500 MHz, CDCl <sub>3</sub> )  | 5    |
| 4) <b>Figure S4.</b> <sup>13</sup> C NMR spectrum of butyl asterrate ( <b>4</b> ; 100 MHz, CDCl <sub>3</sub> ) | 6    |
| 5) <b>Figure S5.</b> <sup>1</sup> H NMR spectrum of geomycin A ( <b>6</b> ; 500 MHz, CDCl <sub>3</sub> )       | 7    |
| 6) <b>Figure S6.</b> <sup>13</sup> C NMR spectrum of geomycin A ( <b>6</b> ; 100 MHz, CDCl <sub>3</sub> )      | 8    |
| 7) <b>Figure S7.</b> <sup>1</sup> H NMR spectrum of geomycin B ( <b>7</b> ; 500 MHz, CDCl <sub>3</sub> )       | 9    |
| 8) <b>Figure S8.</b> <sup>13</sup> C NMR spectrum of geomycin B ( <b>7</b> ; 150 MHz, CDCl <sub>3</sub> )      | 10   |
| 9) <b>Figure S9.</b> <sup>1</sup> H NMR spectrum of geomycin C ( <b>8</b> ; 400 MHz, CDCl <sub>3</sub> )       | 11   |
| 10) <b>Figure S10.</b> <sup>13</sup> C NMR spectrum of geomycin C ( <b>8</b> ; 100 MHz, CDCl <sub>3</sub> )    | 12   |
| 11) <b>Figure S11.</b> CD spectrum of geomycin C ( <b>8</b> ) in CH <sub>3</sub> OH                            | 13   |

---

\* To whom correspondence should be addressed. Tel: +86 10 82618785.  
Fax: +86 10 82618785. E-mail: [cheys@im.ac.cn](mailto:cheys@im.ac.cn).

† Institute of Microbiology.

‡ Graduate School of Chinese Academy of Sciences.

§ North China Pharmaceutical Group Corporation.

**Figure S1.**  $^1\text{H}$  NMR Spectrum of Ethyl Asterrate (**3**; 500 MHz,  $\text{CDCl}_3$ )

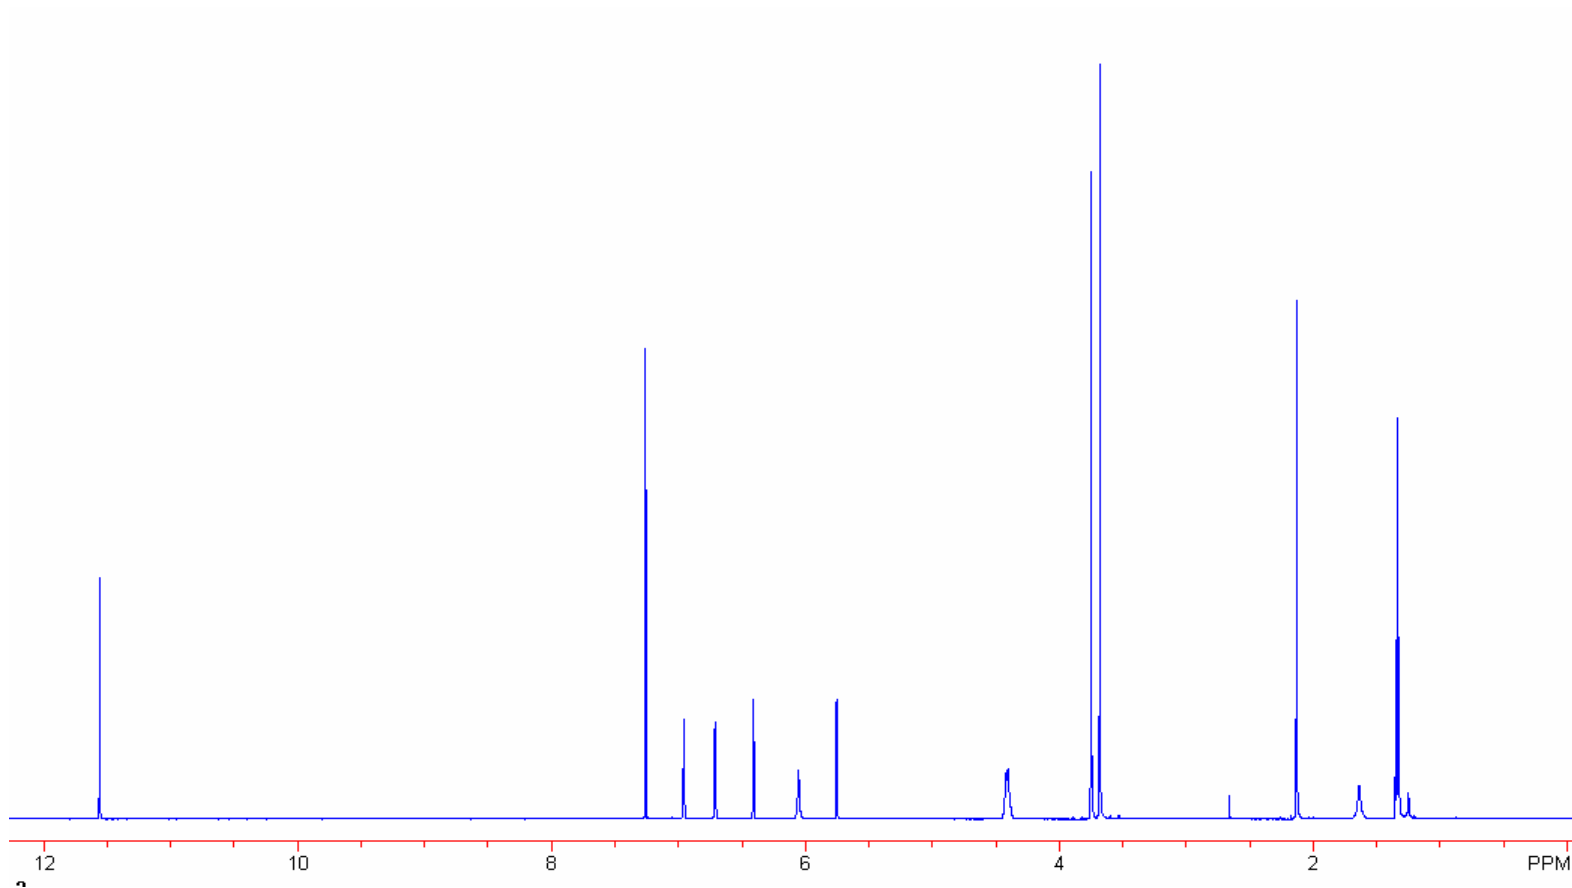

**Figure S2.**  $^{13}\text{C}$  NMR Spectrum of Ethyl Asterrate (**3**; 100 MHz,  $\text{CDCl}_3$ )

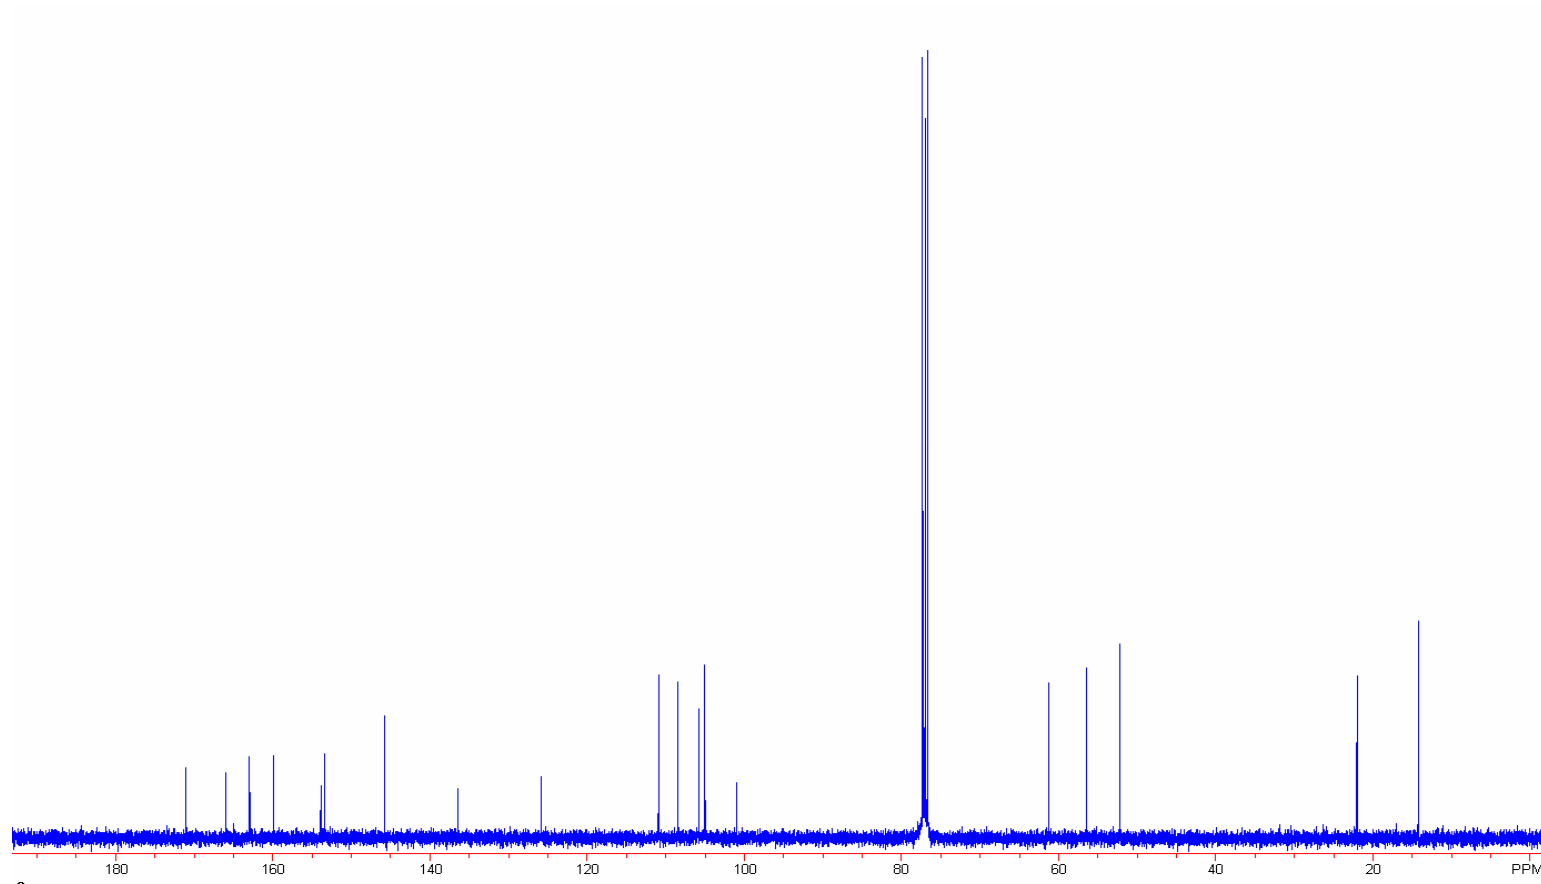

**Figure S3.**  $^1\text{H}$  NMR Spectrum of Butyl Asterrate (**4**; 500 MHz,  $\text{CDCl}_3$ )

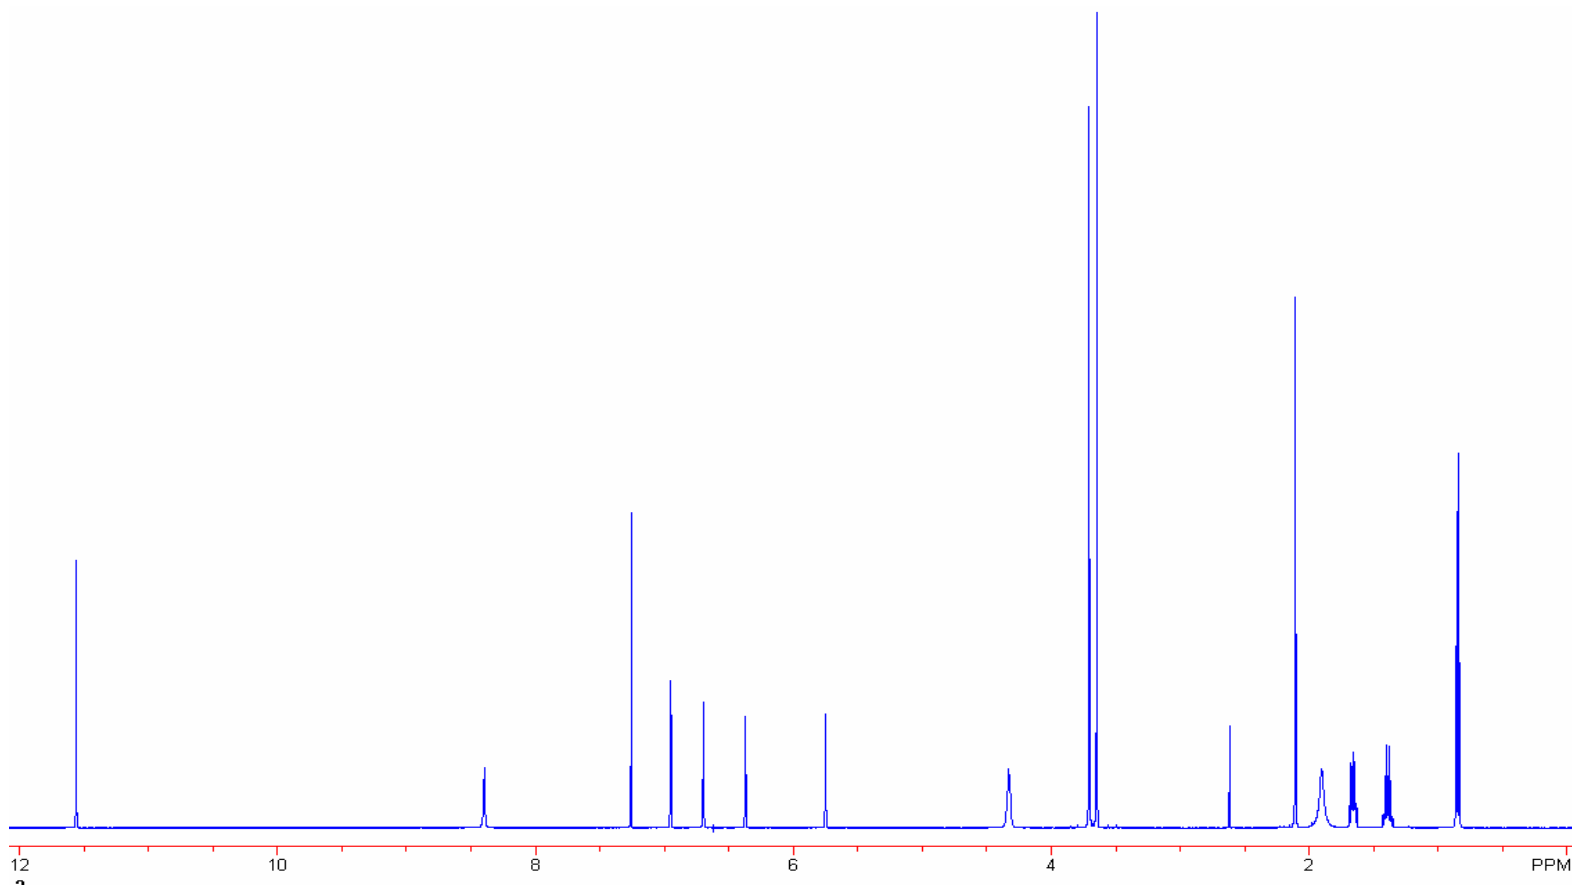

**Figure S4.**  $^{13}\text{C}$  NMR Spectrum of Butyl Asterrate (**4**; 100 MHz,  $\text{CDCl}_3$ )

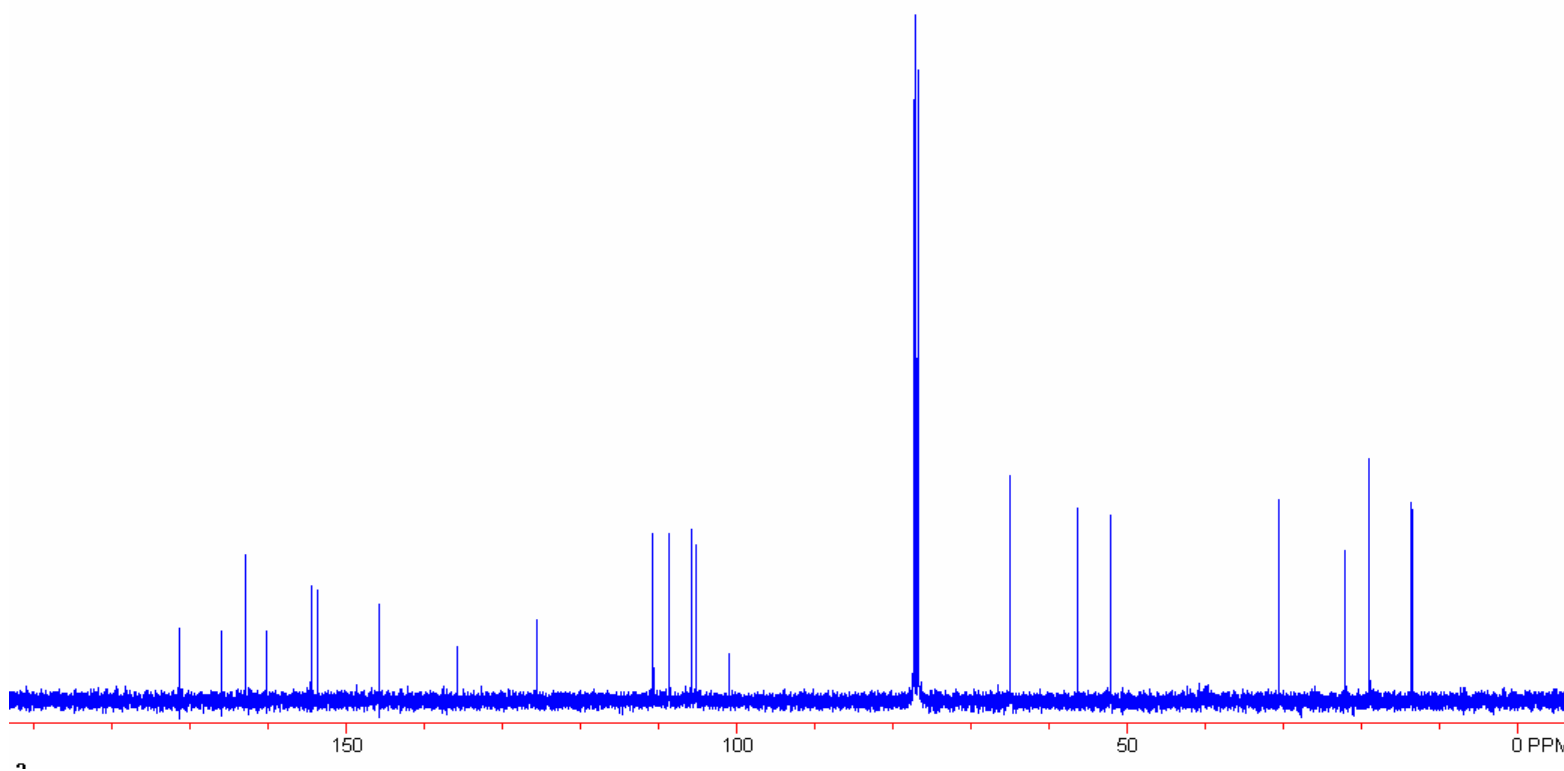

**Figure S5.**  $^1\text{H}$  NMR Spectrum of Geomycin A (**6**; 500 MHz,  $\text{CDCl}_3$ )

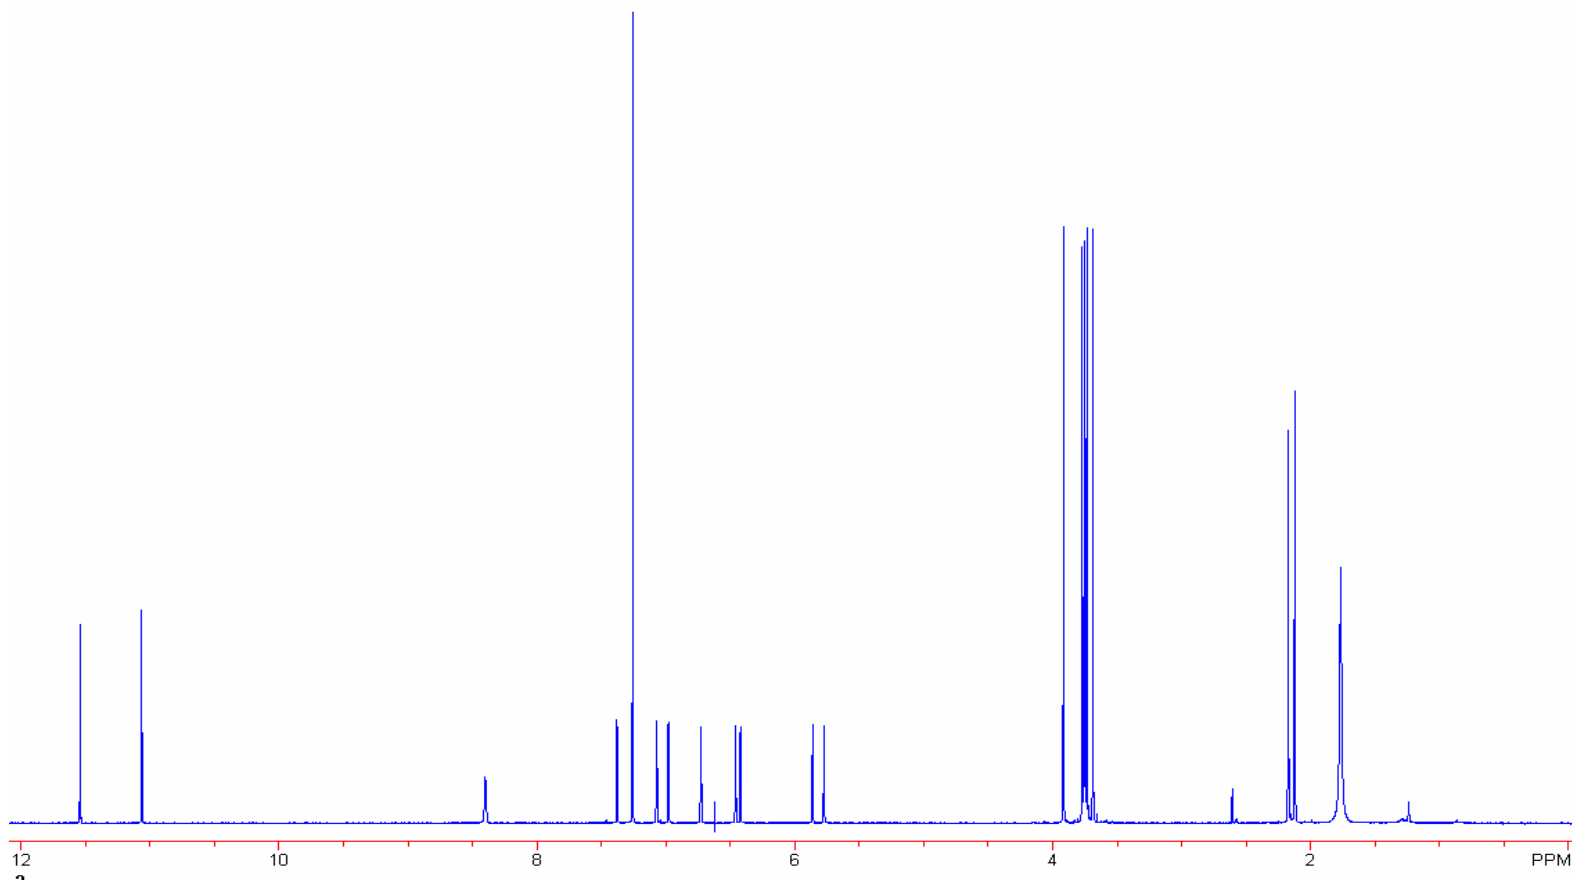

**Figure S6.**  $^{13}\text{C}$  NMR Spectrum of Geomycin A (**6**; 100 MHz,  $\text{CDCl}_3$ )

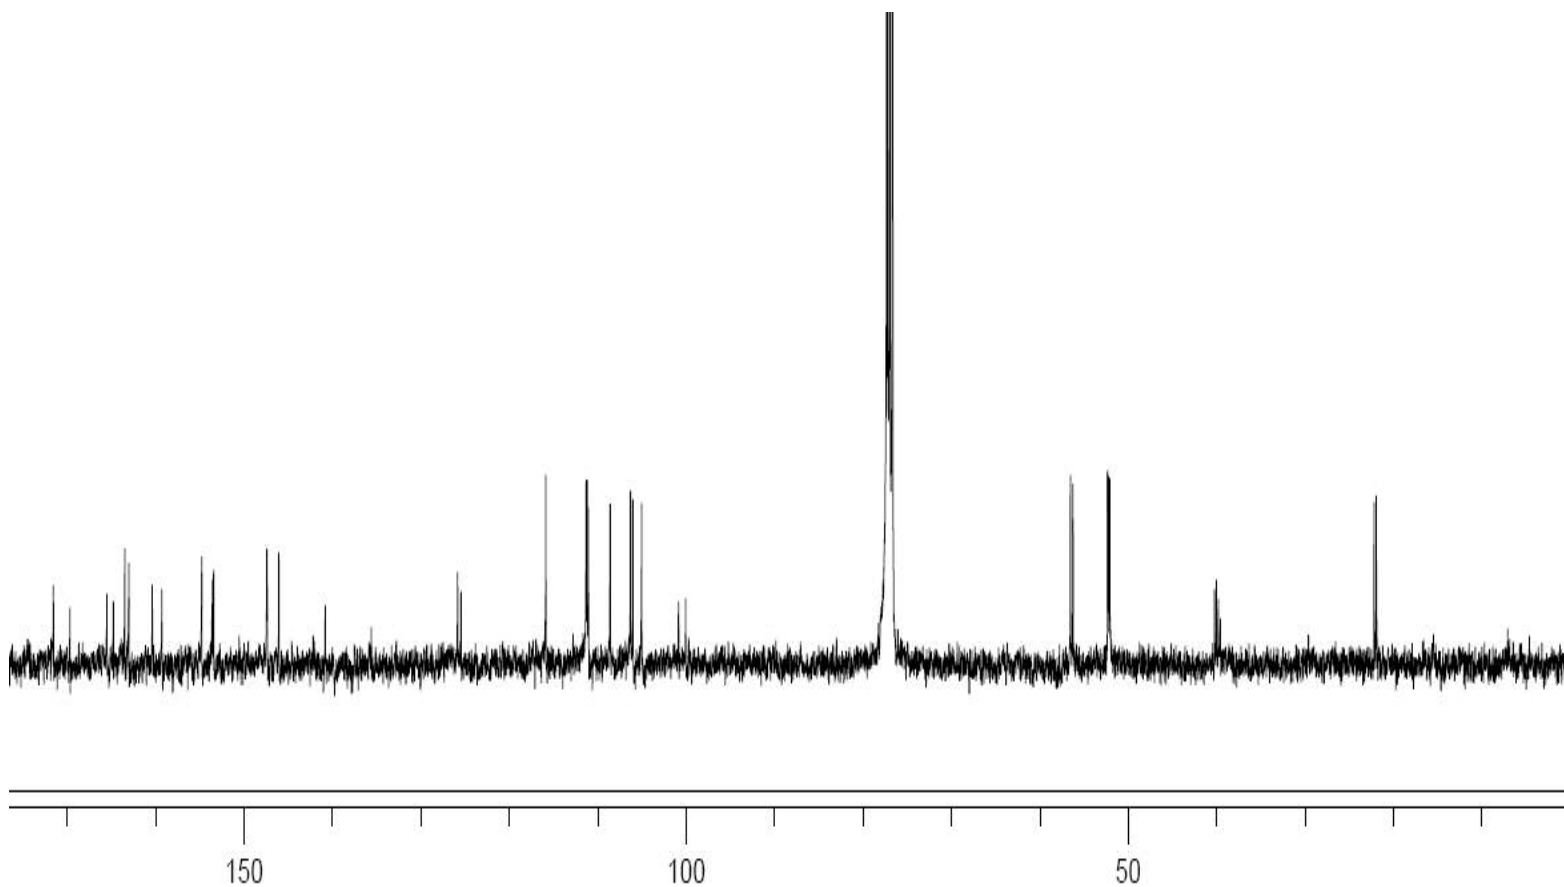



**Figure S7.**  $^1\text{H}$  NMR Spectrum of Geomycin B (7; 500 MHz,  $\text{CDCl}_3$ )

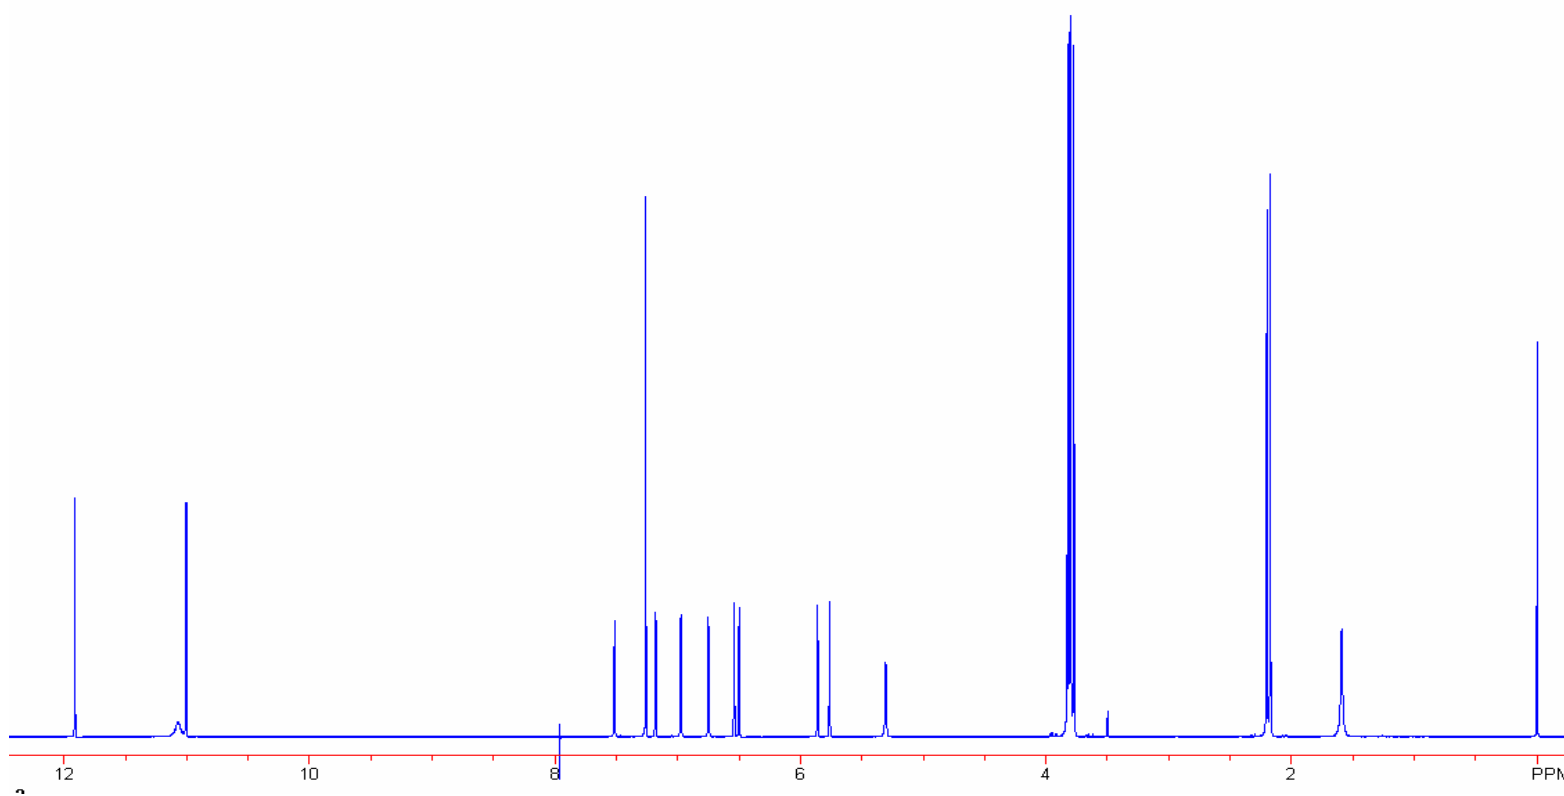

**Figure S8.**  $^{13}\text{C}$  NMR Spectrum of Geomycin B (**7**; 150 MHz,  $\text{CDCl}_3$ )

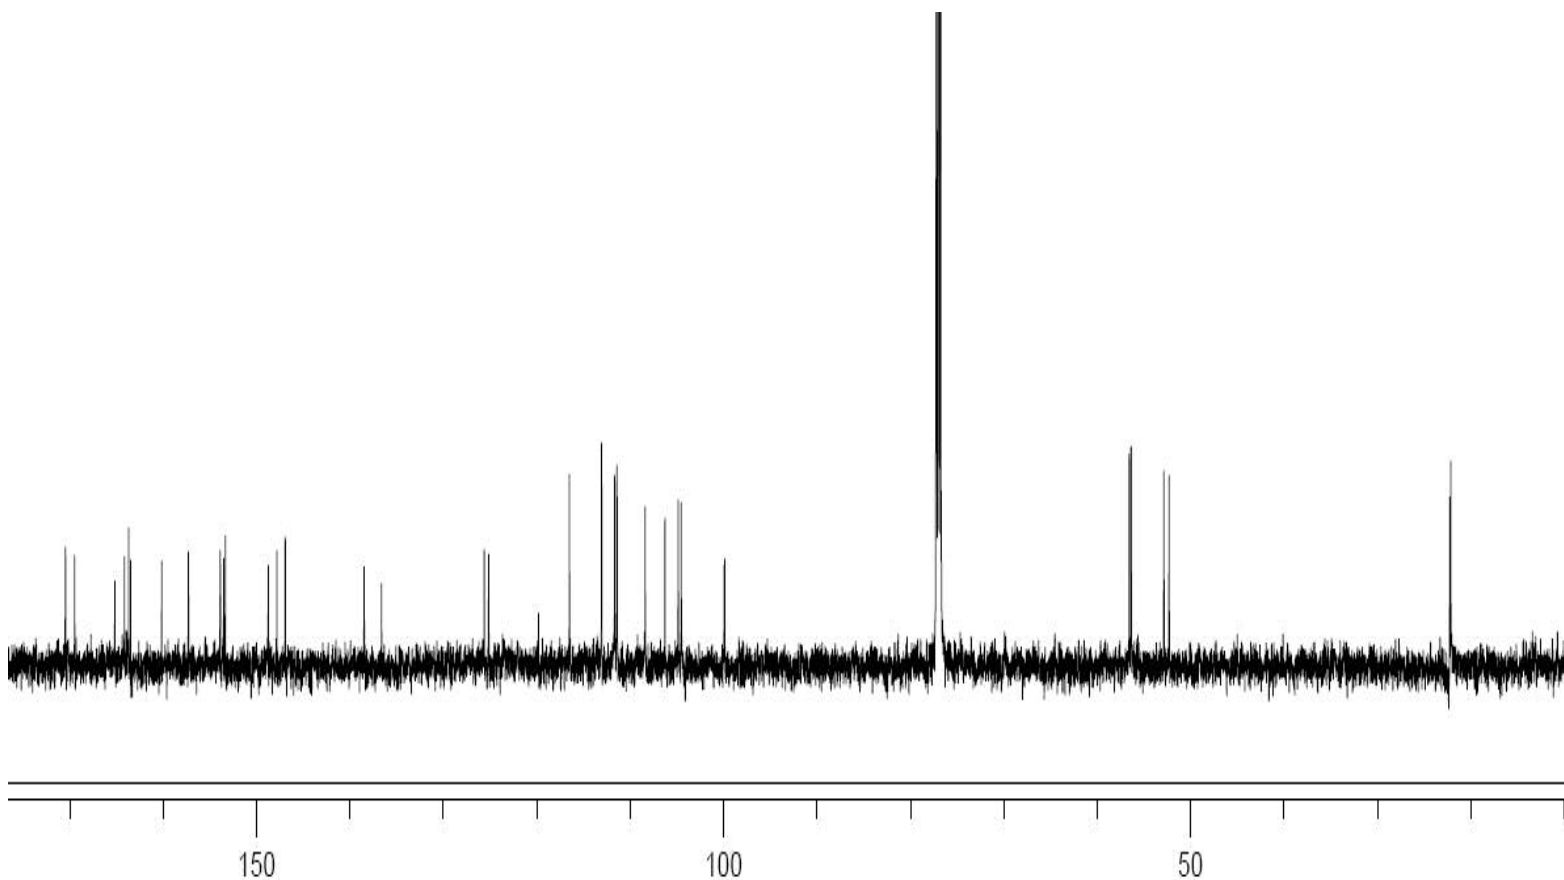

**Figure S9.**  $^1\text{H}$  NMR Spectrum of Geomycin C (**8**; 500 MHz,  $\text{CDCl}_3$ )

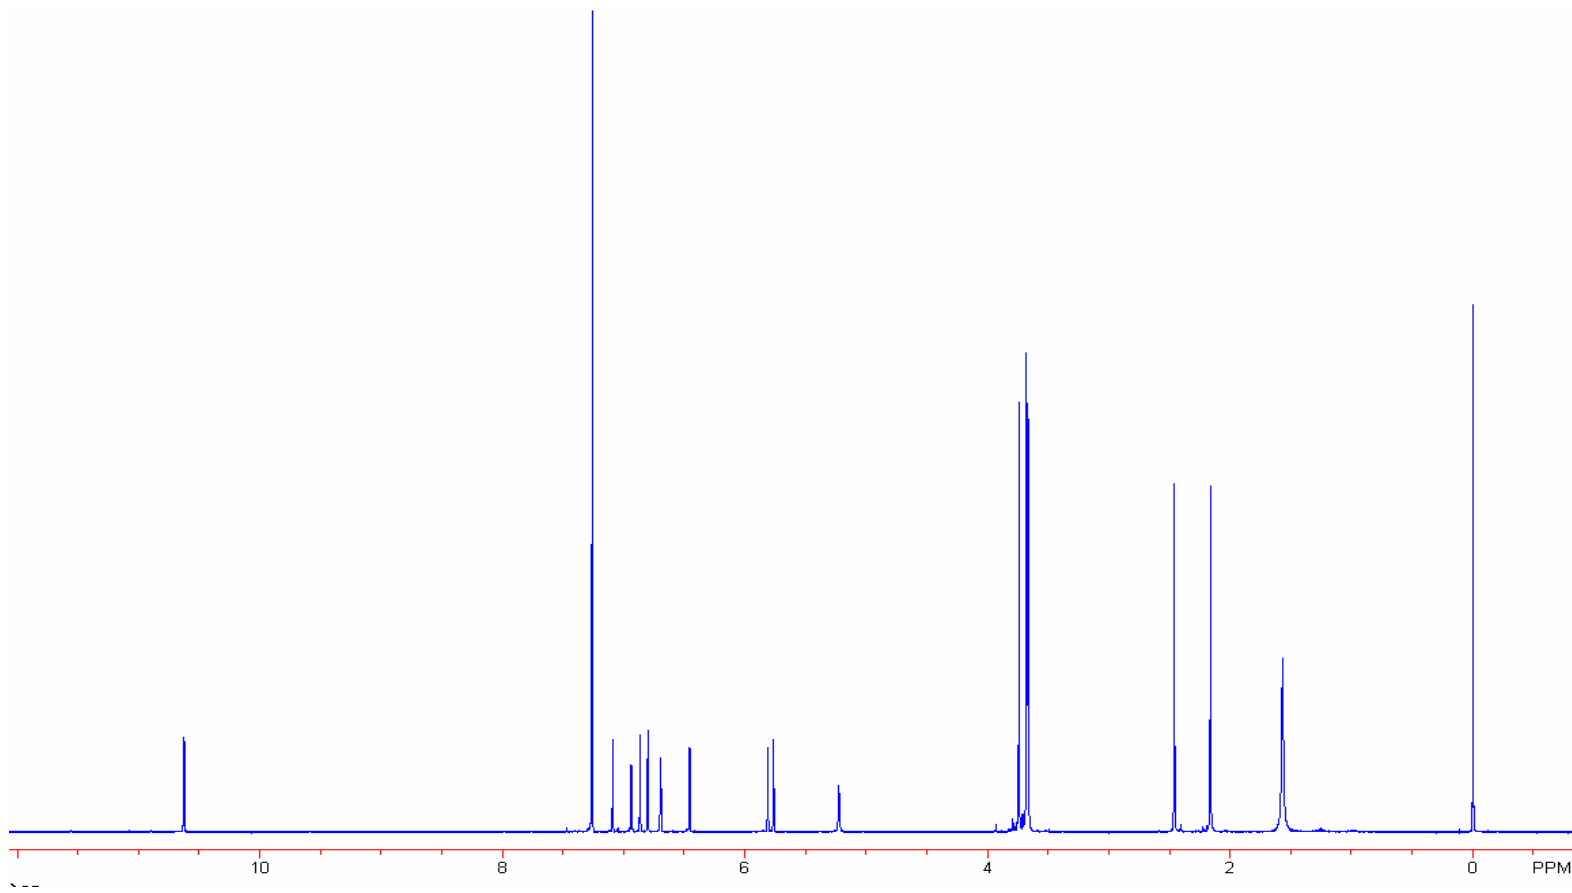

**Figure S10.**  $^{13}\text{C}$  NMR Spectrum of Geomycin C (**8**; 100 MHz,  $\text{CDCl}_3$ )

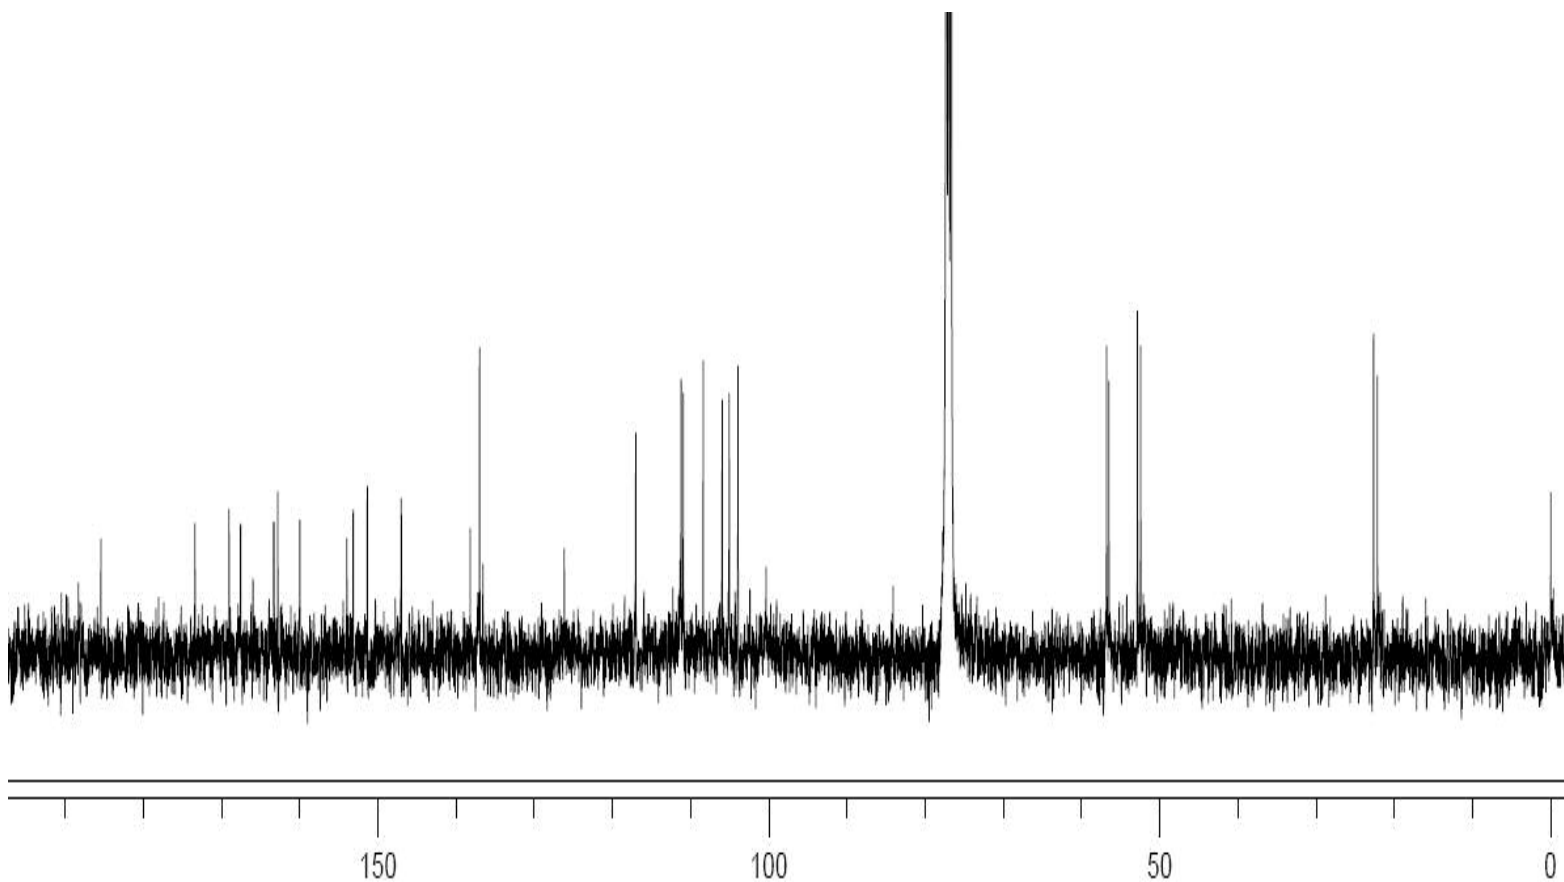

**Figure S11.** CD Spectrum of Geomycin C (**8**; in CH<sub>3</sub>OH)

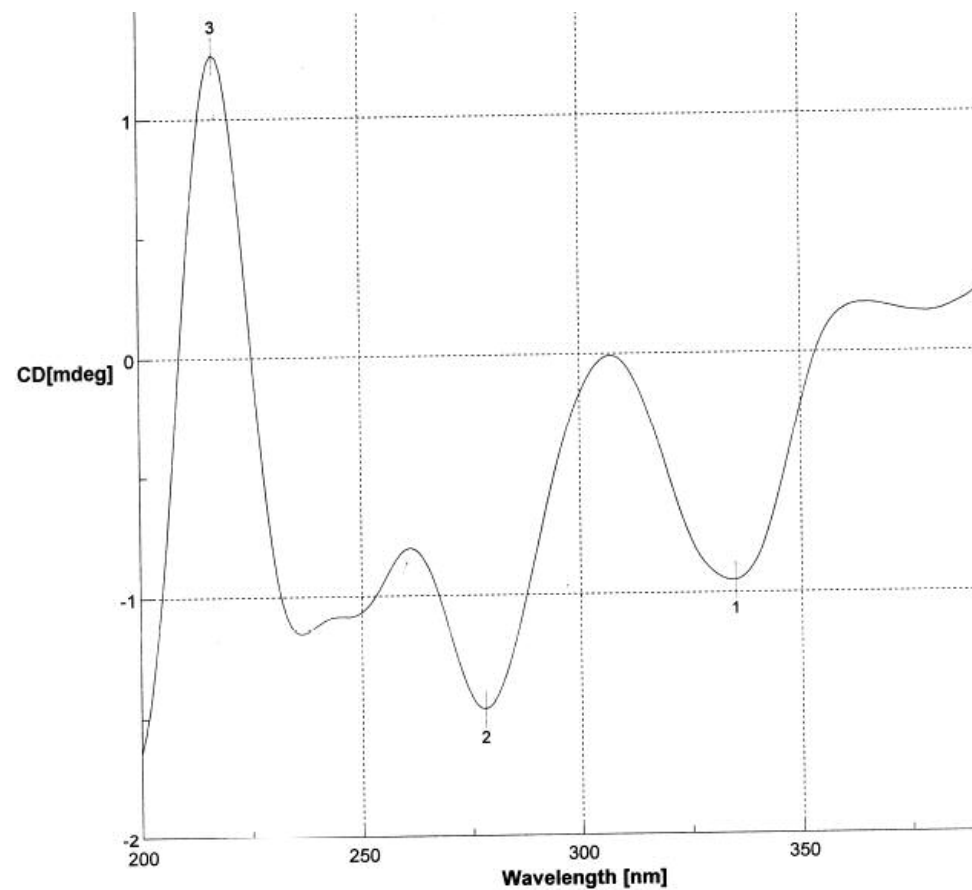

Supplement: Supplementary file 1 [file 4609786]
